# Supplementary material for: Diagnostic approach to rickets: an Endocrine Society of Bengal (ESB) consensus statement
Source: PubMed Central journal article supplement — Ann Pediatr Endocrinol Metab. 2024 Oct 31;29(5):284–307. doi: 10.6065/apem.2448044.022 (PMC11541088; doi:10.6065/apem.2448044.022), 2024-10-31
Supplement: apem-2448044-022-Supplementary-Tables.pdf [file apem-2448044-022-Supplementary-Tables.pdf]

**Supplementary Table 1. Age-specific reference ranges of Pi (mg/dL)**

| Age group      | Abbott ARCHITECT |          | Beckman DxC |          | Roche cobas 6000 |         | Siemens Vista |         |
|----------------|------------------|----------|-------------|----------|------------------|---------|---------------|---------|
|                | Female           | Male     | Female      | Male     | Female           | Male    | Female        | Male    |
| 0–14 Days      | 5.6–10.5         | 5.6–10.5 | 5.9–11.3    | 5.9–11.3 | 5.3–9.8          | 5.3–9.8 | 5.3–10        | 5.3–10  |
| 15 Days–1 year | 4.8–8.4          | 4.8–8.4  | 5.0–9.0     | 5.0–9.0  | 4.6–7.9          | 4.6–7.9 | 4.6–8.0       | 4.6–8.0 |
| 2–5 Years      | 4.3–6.8          | 4.3–6.8  | 4.5–7.2     | 4.5–7.2  | 4.1–6.4          | 4.1–6.4 | 4.1–6.5       | 4.1–6.5 |
| 6–13 Years     | 4.1–5.9          | 4.1–5.9  | 4.3–6.3     | 4.3–6.3  | 4.0–5.6          | 4.0–5.6 | 4.0–5.7       | 4.0–5.7 |
| 14–16 Years    | 3.2–5.5          | 3.5–6.2  | 3.3–5.9     | 3.7–6.5  | 3.1–5.3          | 3.5–5.8 | 3.1–5.3       | 3.4–5.9 |
| 17–19 Years    | 2.9–5.0          | 2.9–5.0  | 3.0–5.3     | 3.0–5.3  | 2.9–4.8          | 2.9–4.8 | 2.9–4.8       | 2.9–4.8 |

Pi, inorganic phosphorus.

Adapted from Adeli et al. Crit Rev Clin Lab Sci 2017;54:358–413.<sup>53)</sup>

**Supplementary Table 2. Age and sex-specific reference ranges of ALP (U/L)**

| Age group      | Abbott ARCHITECT |         | Beckman DxC |         | Roche cobas 6000 |         | Siemens Vista |         |
|----------------|------------------|---------|-------------|---------|------------------|---------|---------------|---------|
|                | Female           | Male    | Female      | Male    | Female           | Male    | Female        | Male    |
| 0–14 Days      | 90–273           | 90–273  | 78–234      | 78–234  | 83–248           | 83–248  | 82–249        | 82–249  |
| 15 Days–1 year | 134–518          | 134–518 | 116–442     | 116–442 | 122–469          | 122–469 | 122–473       | 122–473 |
| 2–10 Years     | 156–369          | 156–369 | 134–315     | 134–315 | 142–335          | 142–335 | 142–336       | 142–336 |
| 11–13 Years    | 141–460          | 141–460 | 122–393     | 122–393 | 129–417          | 129–417 | 128–420       | 128–420 |
| 14–15 Years    | 62–280           | 127–517 | 55–240      | 110–441 | 57–254           | 116–468 | 55–255        | 115–471 |
| 16–17 Years    | 54–128           | 89–365  | 48–111      | 78–312  | 50–117           | 82–331  | 49–116        | 81–333  |
| 18–19 Years    | 48–95            | 59–164  | 43–83       | 52–141  | 45–87            | 55–149  | 43–86         | 53–149  |

ALP, alkaline phosphatase.

Adapted from Adeli et al. Crit Rev Clin Lab Sci 2017;54:358–413.<sup>53)</sup>

**Supplementary Table 3. Age-specific normal values of TP/GFR (mg/dL)**

| Age group       | TP/GFR (mean±SD) |
|-----------------|------------------|
| Newborn–1 month | 7.0±1.1          |
| 1 Month–2 years | 5.1±0.9          |
| 3–12 Years      | 4.6±0.6          |
| 13–16 Years     | 4.1±0.6          |
| 17–18 Years     | 3.3±0.3          |

TP/GFR, ratio of tubular reabsorption of phosphate to glomerular filtration rate.

Adapted and modified from Stark et al. Nephron 1986;44:125–8.<sup>66)</sup>

**Supplementary Table 4. Age-specific references limits (5th and 95th percentiles) in U<sub>Pi</sub>:UCreatinine ratio and U<sub>Calcium</sub>:UCreatinine ratio**

| Age groups     | U <sub>Pi</sub> :UCreatinine ratio (mol/mol) | U <sub>Pi</sub> :UCreatinine ratio (mg/mg) | U <sub>Calcium</sub> :UCreatinine (mol/mol) | U <sub>Calcium</sub> :UCreatinine (mg/mg) |
|----------------|----------------------------------------------|--------------------------------------------|---------------------------------------------|-------------------------------------------|
| 1 month–1 year | 1.2–19.0                                     | 0.34–5.24                                  | 0.09–2.2                                    | 0.03–0.81                                 |
| 1–2 years      | 1.2–14.0                                     | 0.34–3.95                                  | 0.07–1.5                                    | 0.03–0.56                                 |
| 2–3 years      | 1.2–12.0                                     | 0.34–3.13                                  | 0.06–1.4                                    | 0.02–0.50                                 |
| 3–5 years      | 1.2–8.0                                      | 0.33–2.17                                  | 0.05–1.1                                    | 0.02–0.41                                 |
| 5–7 years      | 1.2–5.0                                      | 0.33–1.49                                  | 0.04–0.8                                    | 0.01–0.30                                 |
| 7–10 years     | 1.2–3.6                                      | 0.32–0.97                                  | 0.04–0.7                                    | 0.01–0.25                                 |
| 10–14 years    | 0.8–3.2                                      | 0.22–0.86                                  | 0.04–0.7                                    | 0.01–0.24                                 |
| 14–17 years    | 0.8–2.7                                      | 0.21–0.75                                  | 0.04–0.7                                    | 0.01–0.24                                 |

UPi, urinary inorganic phosphorus; UCreatinine, urinary creatinine.  
Adapted from Matos et al. J Pediatr 1997;131:252-7.

**Supplementary Table 5. Age-specific reference ranges of 1,25(OH)<sub>2</sub>D (pmol/L)**

| Age group  | DiaSorin LIAISON XL |
|------------|---------------------|
| 0–1 Year   | 77–471              |
| 1–3 Years  | 113–363             |
| 3–19 Years | 108–246             |

1,25(OH)<sub>2</sub>D, 1,25-dihydroxyvitamin D.

Adapted from Higgins et al. Clin Chem Lab Med 2018;56:964-72.<sup>83)</sup>
